# Supplementary material for: In Situ Hybridization Strategy Constructs Heterogeneous Interfaces to Form Electronically Modulated MoS2/FeS2 as the Anode for High-Performance Lithium-Ion Storage
Source: MDPI journal article supplement (doi:10.3390/molecules29061387), 2024-03-20
Supplement: s1 [file s1]

**In-situ hybridization strategy construct heterogeneous interfaces to form electronically modulated MoS<sub>2</sub>/FeS<sub>2</sub> as the anode for high performance lithium-ion storage**

Dazhi Li<sup>1</sup>, Changlong Sun<sup>1</sup>, Zeqing Miao<sup>2</sup>, Kesheng Gao<sup>3</sup>, Zeyang Li<sup>1</sup>, Wei Sun<sup>1</sup>, Shengjing Guan<sup>4</sup>, Xiaofei Qu<sup>1\*</sup> and Zhenjiang Li<sup>1\*</sup>

<sup>1</sup> *College of Materials Science and Engineering, Qingdao University of Science and Technology, Qingdao 266042, Shandong, P. R. China*

<sup>2</sup> *College of Electromechanical Engineering, Qingdao University of Science and Technology, Qingdao 266061, Shandong, P. R. China*

<sup>3</sup> *Songshan Lake Materials Laboratory, Dongguan 523808, Guangdong, China*

<sup>4</sup> *School of Chemistry and Chemical Engineering, Shandong University of Technology, Zibo 255049, Shandong, China*

\*E-mail address:

zhenjiangli@qust.edu.cn (Zhenjiang Li)

quxiaofei@qust.edu.cn (Xiaofei Qu)

## **Contents:**

### **S1. Characterization methods and details analysis**

### **S2. Results and discussion**

**Figure S1.** SEM of MoS<sub>2</sub>/FeS<sub>2</sub> *ex-situ* growth mechanism.

**Figure S2.** SEM of pure (a-b) MoS<sub>2</sub> and (c-d) FeS<sub>2</sub>.

**Figure S3.** Selected Area Electron Diffraction (SAED) of MoS<sub>2</sub>/FeS<sub>2</sub>.

**Figure S4** Galvanostatic charge-discharge (GCD) curves of pure MoS<sub>2</sub> and FeS<sub>2</sub> at 0.1 A g<sup>-1</sup>.

**Figure S5.** Capacity retention of pure MoS<sub>2</sub> and FeS<sub>2</sub> at 0.1 A g<sup>-1</sup>.

**Figure S6.** Capacity retention of pure MoS<sub>2</sub> and FeS<sub>2</sub> at 1.0 A g<sup>-1</sup>.

**Figure S7.** EIS of MoS<sub>2</sub>/FeS<sub>2</sub>, pure MoS<sub>2</sub> and FeS<sub>2</sub>.

## **S1. Characterization methods and details analysis**

### **1.1. Materials characterization**

The structure and morphology of MoS<sub>2</sub>/FeS<sub>2</sub> were characterized by scanning electron microscopy (SEM, Hitachi S-4800). The EDX elemental spectroscopy of pristine MoS<sub>2</sub>/FeS<sub>2</sub> was observed using a Talos TEM (FEI, Talos F200X). The powder X-ray diffraction (XRD) measurements were performed on a Rigaku D/MAXRB diffractometer from 5° to 80° (Philips, X'pert Pro MPD, Netherlands), and the excitation wavelength is Cu  $K\alpha$  radiation ( $\lambda = 0.15$  nm). Transmission electron microscopy (TEM) and corresponding high-resolution images were obtained using a Philips Tecnai 20U-Twin microscope at an acceleration voltage of 200 kV. The binding energies of the MoS<sub>2</sub>/FeS<sub>2</sub> nanoparticles were acquired by X-ray photoelectron spectroscopy (XPS) on the Thermo ESCALAB 250 with Al  $K\alpha$  radiation (1486.8 eV) as the excitation source. The data fitting was conducted using XPSPEAK 4.1 software. All the XPS spectra were calibrated with the binding energy of C 1s electron at 284.8 eV.

### **1.2. Device assembly measurements**

CR2032-type coin cells were used to investigate the electrochemical performance of MoS<sub>2</sub>/FeS<sub>2</sub>, pure MoS<sub>2</sub> and FeS<sub>2</sub>. The concentration of moisture and oxygen of argon filled glove box are both below 1 ppm. 80 wt% active materials, 10 wt% conductive carbon (ketjen black), and 10 wt% polyvinylidene fluoride (PVDF) as the binder was mixed in N-methyl-2-pyrrolidone, then the mixture was pasted on copper foil and dried at 80 °C. The average loading density of these active materials is 2.0 mg. Li metal is used as both the counter and reference electrodes. Li metal cathode and MoS<sub>2</sub>/FeS<sub>2</sub>, pure MoS<sub>2</sub> and FeS<sub>2</sub> anodes were electronically separated by a polypropylene film (Celgard 2320) saturated with electrolyte. The electrolyte solution is consist of LiPF<sub>6</sub> (1 M) in ethylene carbonate/dimethyl carbonate/diethy carbonate (1:1:1 vol%). Neware CT-3008W system (Neware Technology Ltd., P. R. China) is used to carry out galvanostatic charge and discharge tests at various current densities. The cell was

discharged at  $0.5 \text{ A g}^{-1}$  for 5 min, followed by a 20 min relaxing from 0.01 to 3.0 V (Shanghai CH Instruments Co., China). Electrochemical impedance spectroscopy (EIS) test is also recorded by CHI660E electrochemical workstation with the frequency ranging from 0.01 Hz to 1 MHz at a 5 mV amplitude signal without applied voltage bias.

## S2. Results and discussion

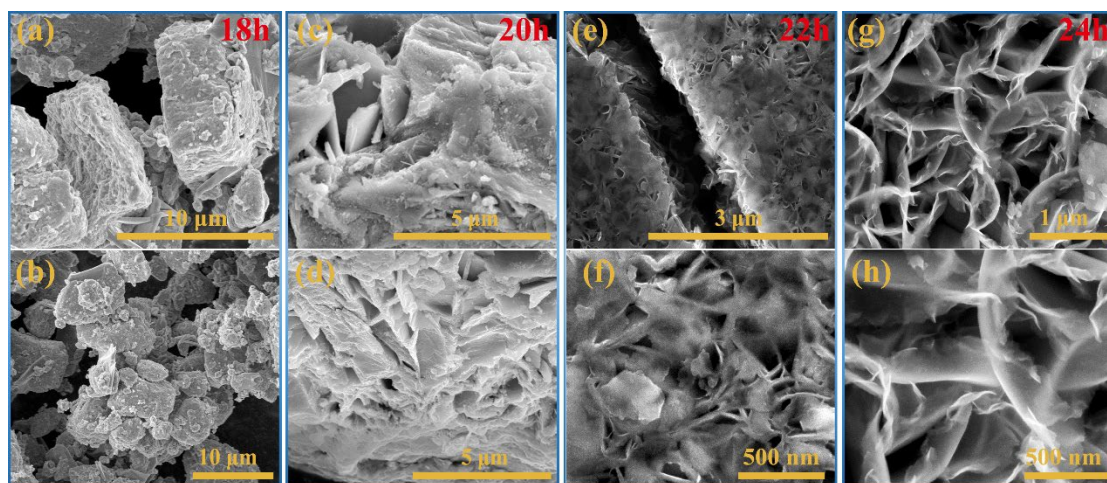

**Figure S1.** SEM of MoS<sub>2</sub>/FeS<sub>2</sub> *ex-situ* growth mechanism.

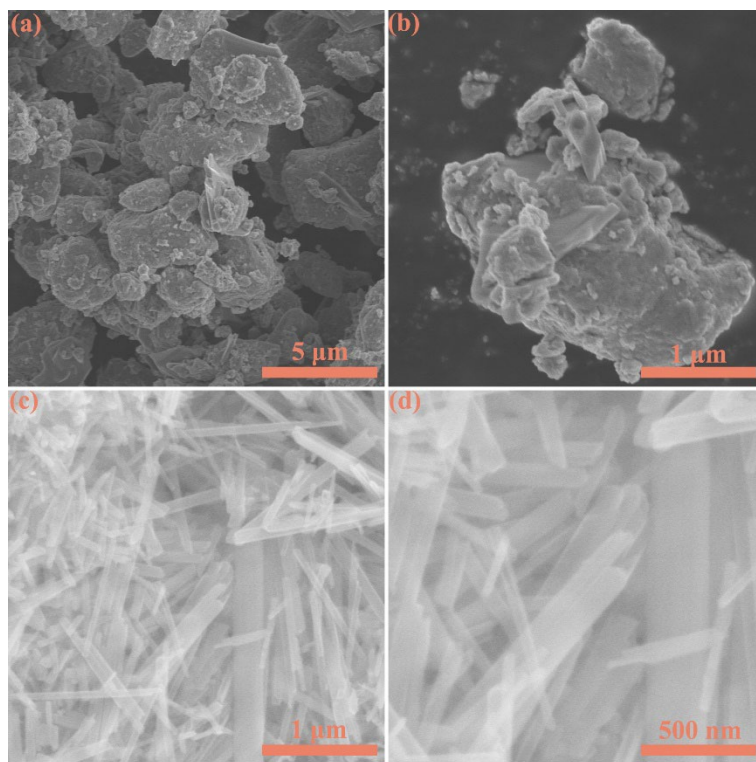

**Figure S2.** SEM of pure (a-b) MoS<sub>2</sub> and (c-d) FeS<sub>2</sub>.

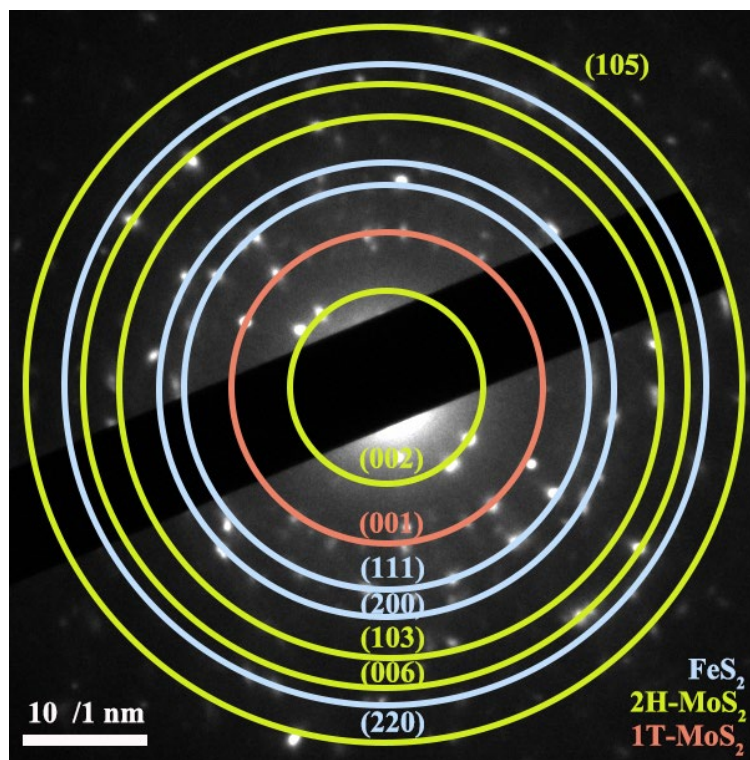

**Figure S3.** Selected Area Electron Diffraction (SAED) of  $\text{MoS}_2/\text{FeS}_2$ .

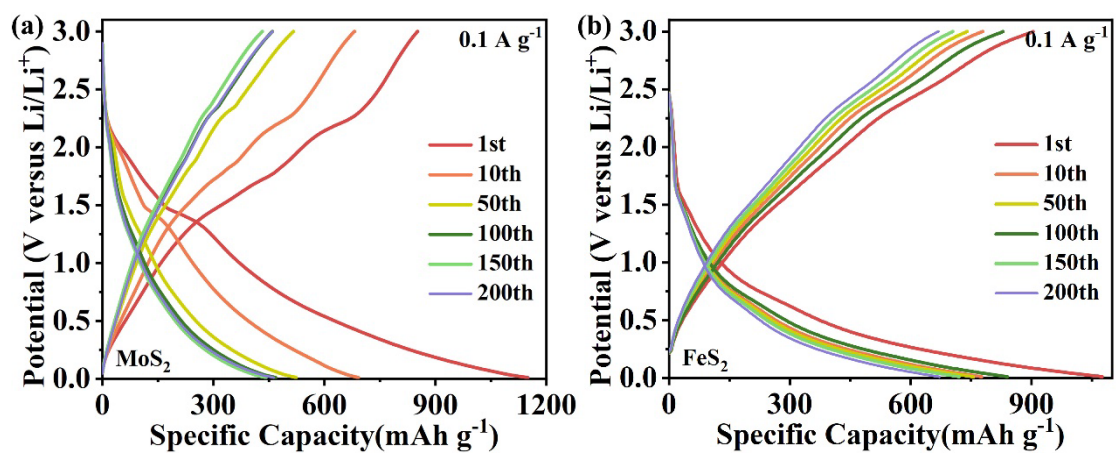

**Figure S4** Galvanostatic charge-discharge (GCD) curves of pure  $\text{MoS}_2$  and  $\text{FeS}_2$  at  $0.1 \text{ A g}^{-1}$ .



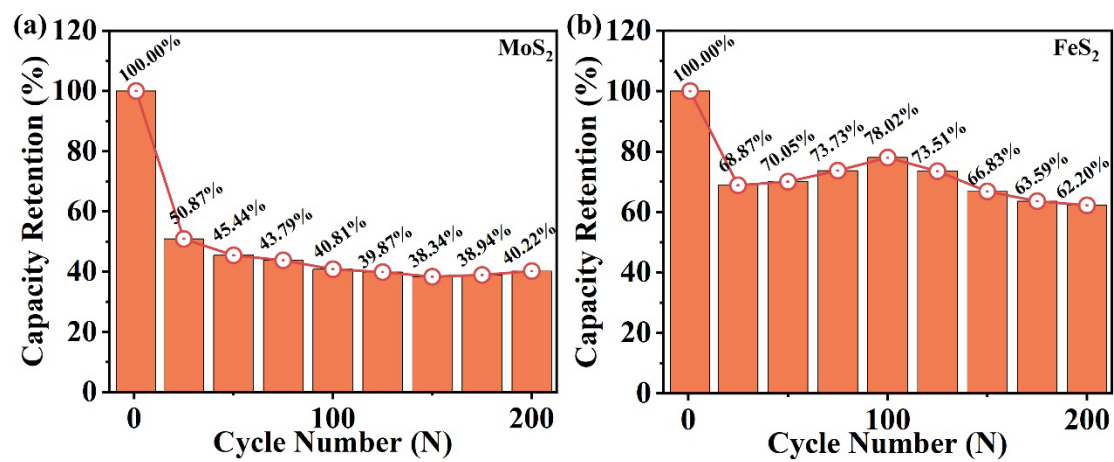

**Figure S5.** Capacity retention of pure MoS<sub>2</sub> and FeS<sub>2</sub> at 0.1 A g<sup>-1</sup>.

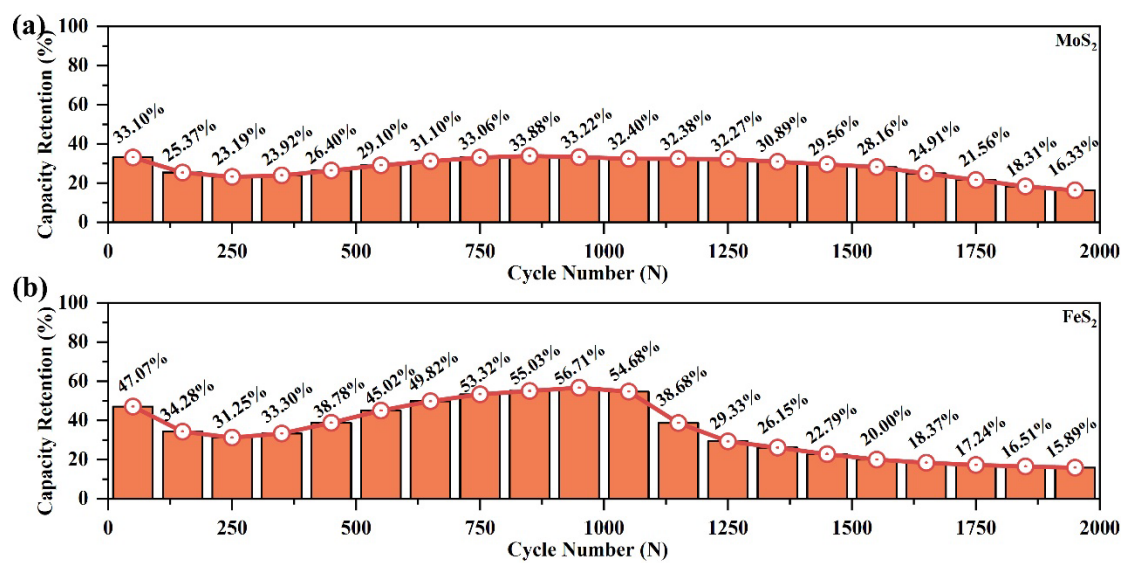

**Figure S6.** Capacity retention of pure MoS<sub>2</sub> and FeS<sub>2</sub> at 1.0 A g<sup>-1</sup>.

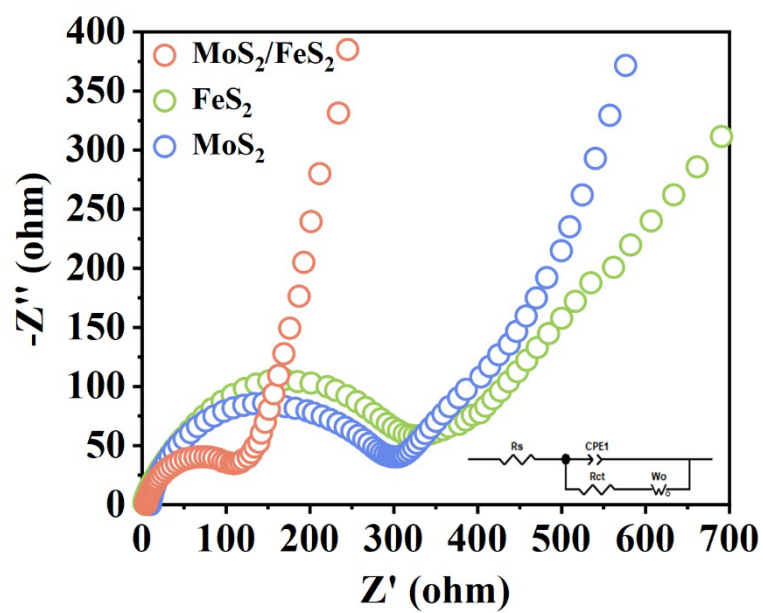

**Figure S7.** EIS of MoS<sub>2</sub>/FeS<sub>2</sub>, pure MoS<sub>2</sub> and FeS<sub>2</sub>.
